# Supplementary material
Source: Frontiers journal article supplement (https://www.frontiersin.org/articles/274949)
Supplement: Image_1.PDF [file Image_1.PDF]

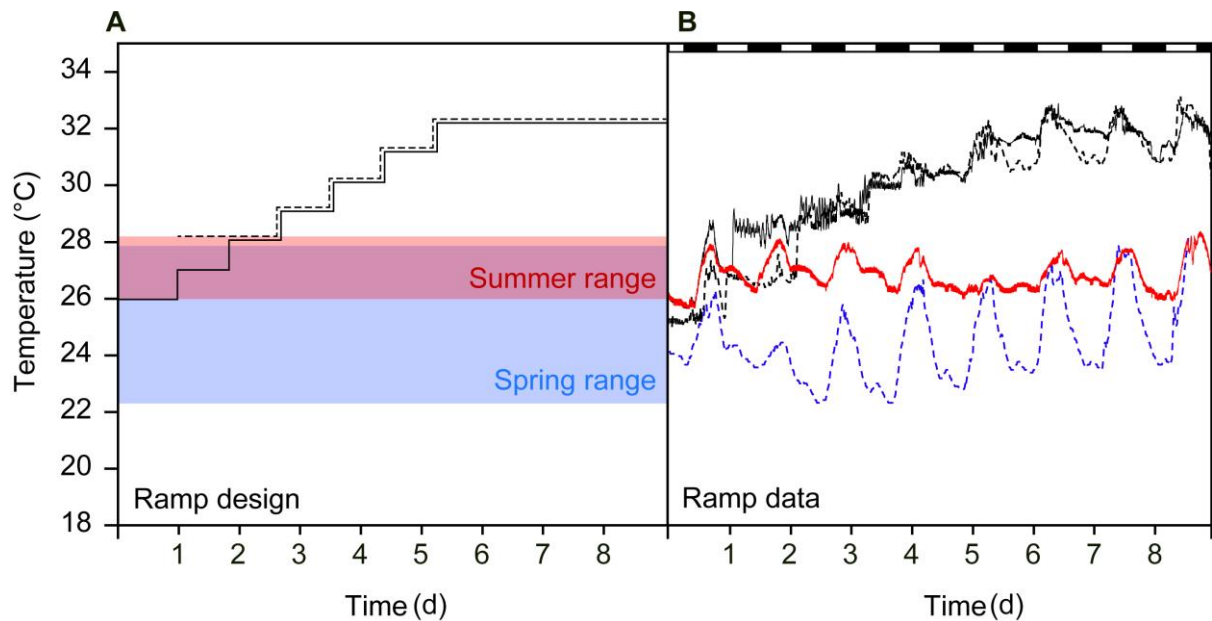

**FIGURE S1 | Ramp design and data from the transient thermal stress experiment.** The thermal ramp design incorporates the natural range of temperatures in spring (blue area) and summer (red area) (**A**). In spring, temperature was increased from 26°C in 1°C increments daily to reach the target treatment temperature of 32°C, and then was held for a further 3 days. In summer, the ambient lagoon was naturally fluctuating between 26 and 28°C on a daily basis. To synchronise the profile with spring, temperature was allowed to fluctuate for the first day under which the spring temperature profile was ramped from 26-27°C, and then the profiles were synchronised from 28-32°C. The temperature data for ambient controls in spring (blue dashed line), and summer (red line), and the thermal ramps for treated corals in spring (hashed black line) and summer (solid black line) (**B**). Day and night periods are indicated by horizontal white and black bars, respectively.
