# Supplementary material
Source: Frontiers journal article supplement (https://www.frontiersin.org/articles/274949)
Supplement: Image_2.PDF [file Image_2.PDF]

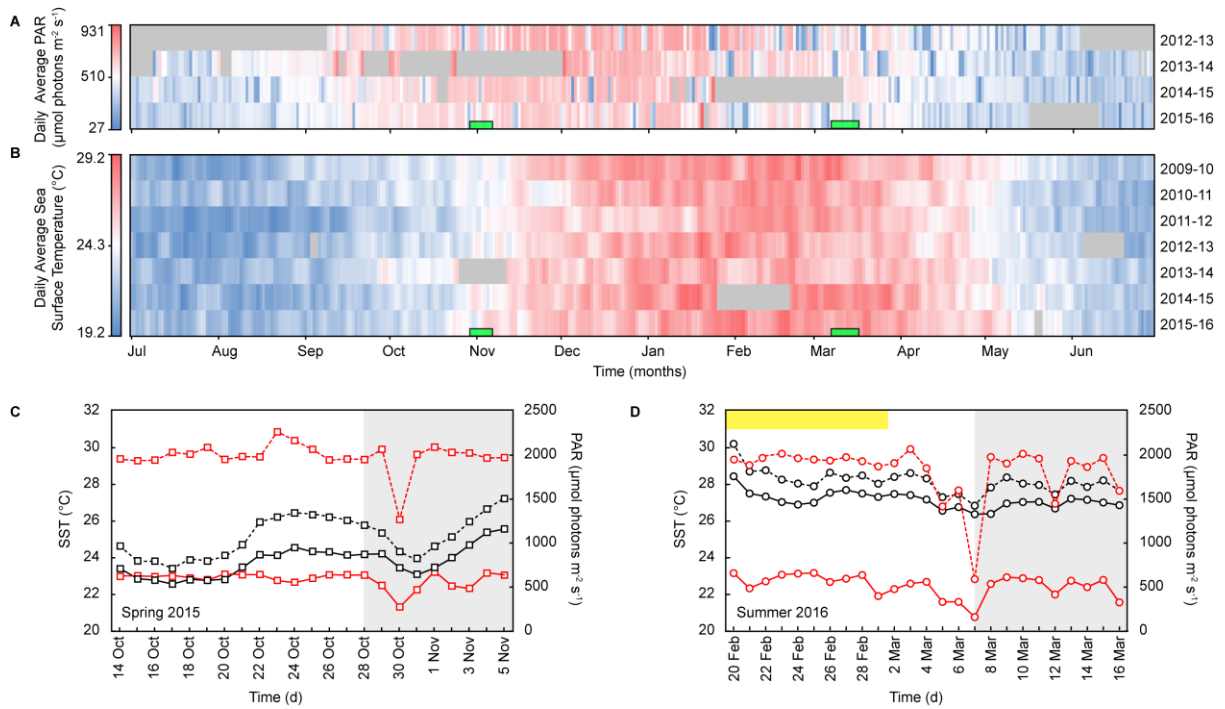

**FIGURE S2 | Seasonal changes in photosynthetically active radiation (PAR) and sea surface temperatures (SST) at Heron Reef from the IMOS network.** Heatmaps of the seasonal changes in daily average PAR (**A**) between 2012 and 2016, and SST (**B**) at 1 to 2 m between 2009 and 2016 as retrieved from the Integrated Marine Observing System (IMOS). Colours correspond to values ranging from the lowest recorded in blue, through the median in white, to the maximum in red (actual minimum, mean, and maximum values are shown on the heatmap legends). Grey areas indicate missing or quality control removed data and green horizontal bars in 2015-2016 indicate the experimental periods. Daily average (solid lines) and daily maximum (hashed lines) for SST (black symbols, left axes) and PAR (red symbols, right axes) for spring (**C**) and summer (**D**) experimental periods (grey areas) including the two-week period leading into the experiment. The “bleach watch” (yellow) model (NOAA) is indicated as a horizontal band (**D**).
