# Supplementary material
Source: Frontiers journal article supplement (https://www.frontiersin.org/articles/274949)
Supplement: Image_3.PDF [file Image_3.PDF]

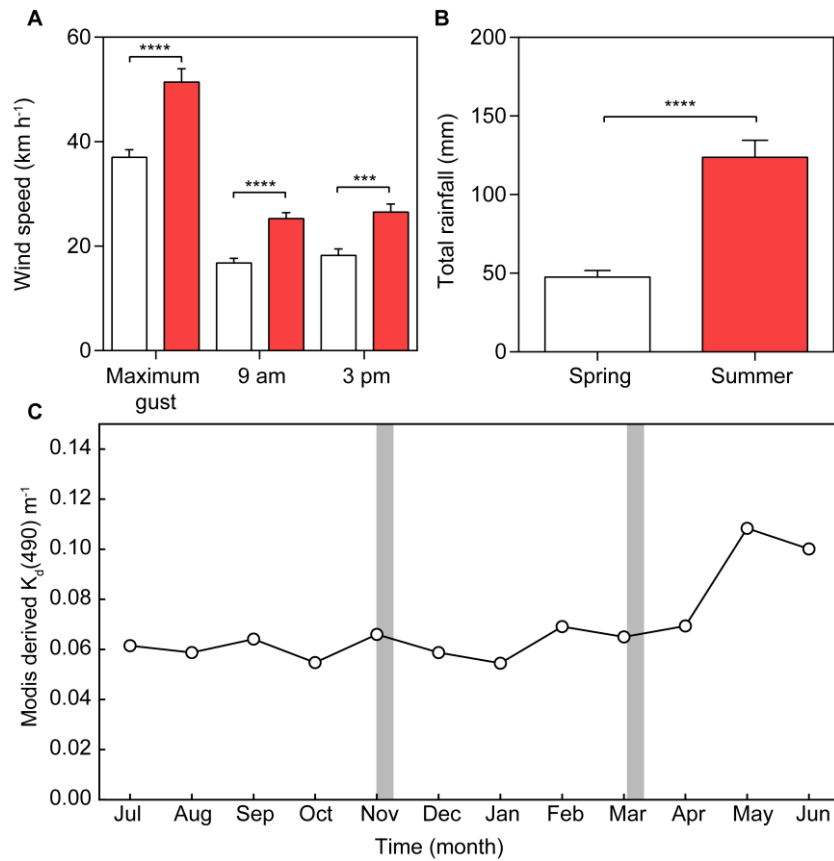

**FIGURE S3 | Seasonal differences in wind speed, rainfall, and in-water PAR attenuation at Heron Reef.** Data from the Bureau of Meteorology (BOM, Queensland Australia) for wind speed, including maximum daily gusts, wind speed at 0900 h, and wind speed at 1500 h (+ SE) during the experimental period in spring (white bar) and summer (red bar), inclusive of the two-week period leading into the experiment (**A**). Total rainfall data, also retrieved from BOM, showing the average rainfall at Heron Island weather station between 1959 and 2007 (all available data) for October and November (spring, white bar) and for February and March (summer, red bar) (**B**). Values represent means  $\pm$  SE. Significant differences, given by unpaired two tailed *t*-test with Welch's correction, are indicated by asterisks (\*\*\*\* =  $p < 0.0001$ , \*\*\* =  $p < 0.001$ ). The diffuse attenuation coefficient ( $K_d$ ) of downwelling irradiance at 490 nm, used to approximate seasonal changes in water turbidity, remotely sensed (MODIS system) during the experimental periods (indicated by grey areas) in spring (2015) and summer (2016) (**C**).
