# Supplementary material
Source: Frontiers journal article supplement (https://www.frontiersin.org/articles/274949)
Supplement: Image_4.PDF [file Image_4.PDF]

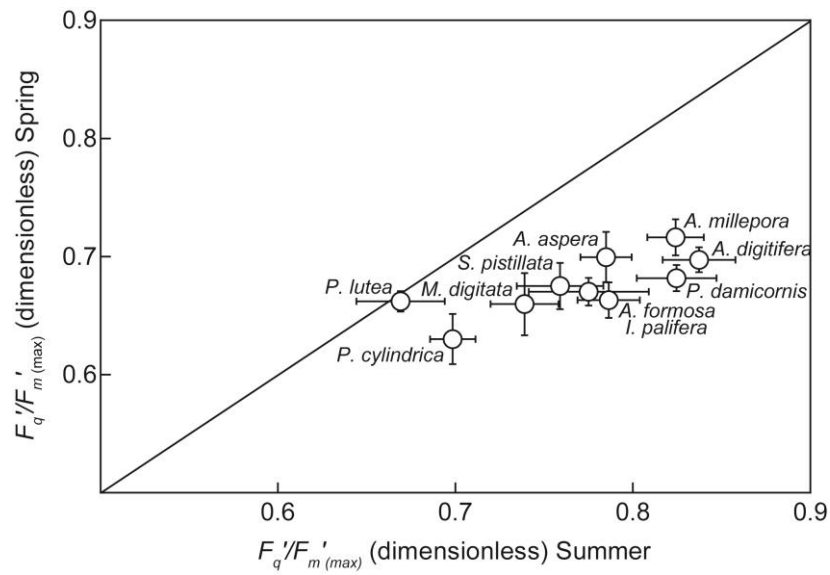

**FIGURE S4 | Seasonal changes in the derived values of  $F_q'/F_{m(max)}$ .** The derived maximum quantum yield ( $F_q'/F_{m(max)}$ , dimensionless) for all 10 species of coral plotted according to season (1:1 ratio indicated by diagonal line) with spring on the vertical axis and summer on the horizontal axis. Symbols are labelled according to respective coral species. Values represent means ( $N = 4$ )  $\pm$  SE.
